# Supplementary material
Source: publisher figshare collection journal article supplement (https://frontiersin.figshare.com/ndownloader/files/22927106)
Supplement: Supplementary file [file 22927106]

### Oligonucleotides used for qPCR Amplifications

| Gene name | MeDIP/RNA | Forward/Reverse | Sequence 5' --> 3'        | Promoter Region     |
|-----------|-----------|-----------------|---------------------------|---------------------|
| LAG3      | RNA       | Forward         | ACACCCCATCCCAGAGGAGTT     | N/A                 |
|           |           | Reverse         | AAATCGTCTTGGTCGCCACTGT    | N/A                 |
| IL12RB2   | RNA       | Forward         | CCAGCCTCAGCTCTGTGAAAT     | N/A                 |
|           |           | Reverse         | GCGTTGAGAAAATGCCACC       | N/A                 |
| SOCS3     | RNA       | Forward         | TTTCTGATCCGCGACAGCTC      | N/A                 |
|           |           | Reverse         | CGGAGGAGGGTTTCAGTAGGT     | N/A                 |
| PIK3IP1   | RNA       | Forward         | GCTACTCCTACAAGAGGGGGAA    | N/A                 |
|           |           | Reverse         | CCTCCTGAGGGTCAACTGGA      | N/A                 |
| BUB1      | RNA       | Forward         | TCCTTCAGATGCTTGAAGCCCA    | N/A                 |
|           |           | Reverse         | ACAGAGGGGATGACAGGGTTC     | N/A                 |
| CDK1      | RNA       | Forward         | TAAGCCGGGATCTACCATACCC    | N/A                 |
|           |           | Reverse         | CCTGGAATCCTGCATAAGCACA    | N/A                 |
| BIRC5     | RNA       | Forward         | AGGACCACCGCATCTCTACA      | N/A                 |
|           |           | Reverse         | TGTTCTCTATGGGGTCGTCA      | N/A                 |
| B2M       | RNA       | Forward         | AGCCCAAGATAGTTAAGTGGGATCG | N/A                 |
|           |           | Reverse         | TCCAAATGCGGCATCTTCAAACC   | N/A                 |
| ITGAL     | RNA       | Forward         | CCTGTGTTACCTCTTCCGCC      | N/A                 |
|           |           | Reverse         | GAACAGCAGCAAAGTGGTACG     | N/A                 |
| GZMH      | RNA       | Forward         | CAGGGAAGCTCCATAAATGTCACC  | N/A                 |
|           |           | Reverse         | CAGTGTGGTTGCTAAAGTGCTC    | N/A                 |
| CEBPE     | RNA       | Forward         | CACATACCTTCGGCCCAGAC      | N/A                 |
|           |           | Reverse         | AAAGGGGCCTTGAGAACGC       | N/A                 |
| DEFA4     | RNA       | Forward         | ACTGCCTCATTGGTGGTGTG      | N/A                 |
|           |           | Reverse         | GGCGTTCCCAGCATGACATT      | N/A                 |
| IFNG      | RNA       | Forward         | TGAATGTCCAACGCAAAGCA      | N/A                 |
|           |           | Reverse         | CTGTTTTAGCTGCTGGCGAC      | N/A                 |
| CTSG      | RNA       | Forward         | GATGTGGAGGGTTCCTGGTG      | N/A                 |
|           |           | Reverse         | GTGTTGCTGGGTGTTTTCCC      | N/A                 |
| GZMB      | RNA       | Forward         | AGCCTGCACCAAAGTCTTCAA     | N/A                 |
|           |           | Reverse         | TTTCATTACAGCGGGGGCTT      | N/A                 |
| GZMH      | MeDIP     | Forward         | ACATGGCTCTTGCCCTTGAA      | From -317 to -430   |
|           |           | Reverse         | GTCTCACACCAACAGGCAGA      | From -317 to -430   |
| ITGAL     | MeDIP     | Forward         | GCAAGCAGGCACAGGAAATG      | From -77 to +51     |
|           |           | Reverse         | TTCTCACAGAGGCAACAGGC      | From -77 to +51     |
| CEBPE     | MeDIP     | Forward         | GGAACAAGCTCTACACGCGA      | From -35 to -182    |
|           |           | Reverse         | TGGAGCCACCGGAGGATTAT      | From -35 to -182    |
| CTSG      | MeDIP     | Forward         | ATGTTCCAGACGGCTCCTTG      | From -2474 to -2604 |
|           |           | Reverse         | CCCATTGTTGAGTATGCGGC      | From -2474 to -2604 |
| DEFA4     | MeDIP     | Forward         | AAATGCCACCCACACACAGA      | From -407 to -577   |
|           |           | Reverse         | CAACCTGCCCTATCCAGCAA      | From -407 to -577   |
